# Supplementary material
Source: Springer Nature journal article supplement (https://www.springermedizin.de/resource/supplementary/13075_2013_4041_MOESM2_ESM.pdf/9695930)

## GOUT

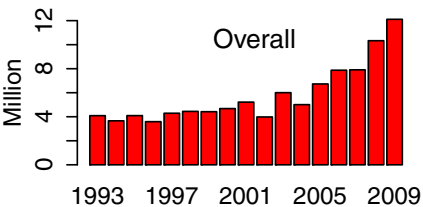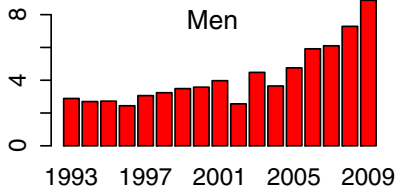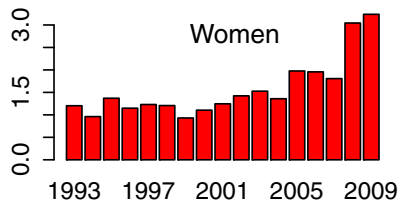

## RA

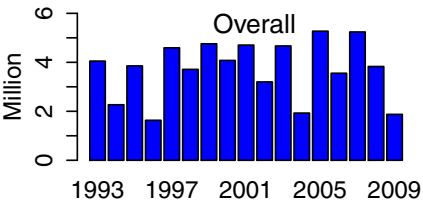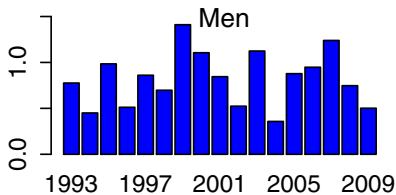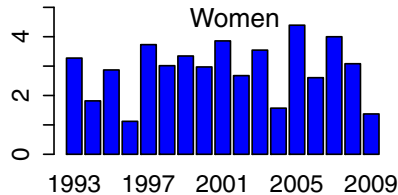

## All MSK

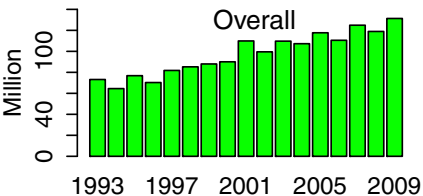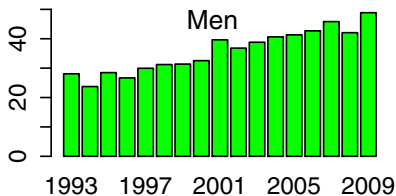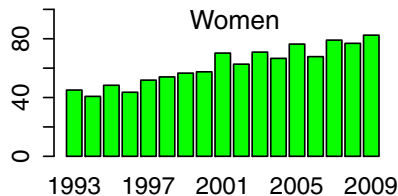

Supplement: MOESM2 [file 9695930]
